# Supplementary material for: Lipoprotein proteome profile: novel insight into hyperlipidemia
Source: PubMed Central journal article supplement (PMC8032137; doi:10.1002/ctm2.361), 2021-04-08
Supplement: CTM2-11-e361-s003.pdf [file CTM2-11-e361-s003.pdf]

| Biological Functions       | Both (73)                                                                                                          | Human (61)                                                                                                                                                                                       | Golden Hamster (84)                                                                                                   |
|----------------------------|--------------------------------------------------------------------------------------------------------------------|--------------------------------------------------------------------------------------------------------------------------------------------------------------------------------------------------|-----------------------------------------------------------------------------------------------------------------------|
| <b>1. Lipid metabolism</b> | <b>18</b>                                                                                                          | <b>5</b>                                                                                                                                                                                         | <b>11</b>                                                                                                             |
| 1.1 Lipid transport        | (12): <u>APOA2, APOA4, APOB, APOC1, APOA1, APOC3, APOE, APOH, APOM, CETP, APOC2, APOC4</u>                         | (4): APOA5, APOD, APOF, APOL1                                                                                                                                                                    |                                                                                                                       |
| 1.2 Lipid Metabolism       | (6): <u>LCAT, PLTP, AZGP1, ALB</u> , LDLR, RBP4                                                                    | (1): LPA                                                                                                                                                                                         | (11): DBI, BPIFA2, PSAP, ANGPTL8, SNCA, SERPINA6, PCSK9, SCGB1A1, POSTN, ITGA2, GPLD1                                 |
| <b>2. Immunity</b>         | <b>33</b>                                                                                                          | <b>28</b>                                                                                                                                                                                        | <b>23</b>                                                                                                             |
| 2.1 Complement activation  | (5): <u>C3, CFB, CFD, CLU, IGHM</u>                                                                                | (4): C4B, C9, CFHR4, C4BPA                                                                                                                                                                       | (9): C2, C4, CFH, CFI, CFP, ITGAM, ITGB2, CFP, CFHRP                                                                  |
| 2.2 Inflammatory response  | (14): <u>AHSG, HP, ORM1, PPBP, SAA1, SAA2, SERPINA1, SERPINC1, SERPINF2, SERPING1, THBS1, FN1, ITIH4, SERPINF1</u> | (6): AGT, IGFBP4, ORM2, PARK7, PF4, PLA2G7                                                                                                                                                       | (5): APCS, ICAM1, VCAM1, SAA3, SAA5                                                                                   |
| 2.3 Immune Response        | (14): A1BG, ACTB, <u>AMBP, B2M, CAMP, CRP, CST3, GSN, HPX, KRT1, PPIA, TF, TTR, VTN</u>                            | (18): CD5L, CHGA, CNN2, COL1A1, IGHA1, IGHG1, IGHG2, IGHG3, IGHV3-74, IGKC, IGLC2, JCHAIN, LBP, DEFA1, LRG1, NAPRT, UBB, SERPINA3                                                                | (9): CRIP1, CST6, DSC1, IHH, KRT6A, MB, POMC, RPS27A, TREML1                                                          |
| <b>3. Coagulation</b>      | <b>9</b>                                                                                                           | <b>2</b>                                                                                                                                                                                         | <b>9</b>                                                                                                              |
|                            | (9): <u>A2M, CFL1, F2, FGA, HBB, KNG1</u> , PLG, SERPIND1, F5                                                      | (2): FBLN1, FLNA                                                                                                                                                                                 | (9): F13A1, FGB, FGG, HRG, ITGB1, ITIH3, KLKB1, TFPI, TMSB4X                                                          |
| <b>4. Redox activity</b>   | <b>3</b>                                                                                                           |                                                                                                                                                                                                  | <b>4</b>                                                                                                              |
|                            | (3): <u>PCYOX1, PON1, GPX3</u>                                                                                     |                                                                                                                                                                                                  | (4): PRDX2, BLVRB, CP, TRX                                                                                            |
| <b>5. Others</b>           | <b>10</b>                                                                                                          | <b>26</b>                                                                                                                                                                                        | <b>38</b>                                                                                                             |
|                            | (10): ANG, ARHGDIB, <u>HBA, ITIH2, KRT2, PFN1, SFTPB, TXN, VTDB</u> , KRT10                                        | (26): AHNAK, BASP1, CCDC40, CSRP1, FERMT3, HPR, IGFBP2, IGFBP3, KRT33B, KRT83, KRT9, MENT, MTPN, OTOF, PDLIM1, PON3, POTEI, RNASE4, SAA2-SAA4, SH3BGRL3, SYNE1, TAGLN2, TGOLN2, TLN1, TPM4, UBTf | (37): AFM, ANTXR1, ARHGDIB, CA1, TNA, CNDP1, CST6, EIF5A, FAM171B, FETUB, GC, HBA, HBZ, HPP, ITIH1, ITIH4, and so on. |
